# Supplementary material for: Synthesis of a flexible macrocyclic tetraimidazolium salt–precursor for a tetracarbene ligand with metal dependent coordination modes
Source: Royal Society of Chemistry journal article supplement (doi:10.1039/c5dt02115d), 2015-01-01
Supplement: c5dt02115d1.pdf [file c5dt02115d1.pdf]

# **Synthesis of a flexible macrocyclic tetraimidazolium salt – precursor for a tetracarbene ligand with metal dependent coordination modes**

Christian Schulte to Brinke, and F. Ekkehardt Hahn\*

*Institut für Anorganische und Analytische Chemie, Westfälische Wilhelms-Universität Münster,  
Corrensstraße 30, D-48149 Münster, Germany. \*e-mail: fehahn@uni-muenster.de*

## **Supporting Information**

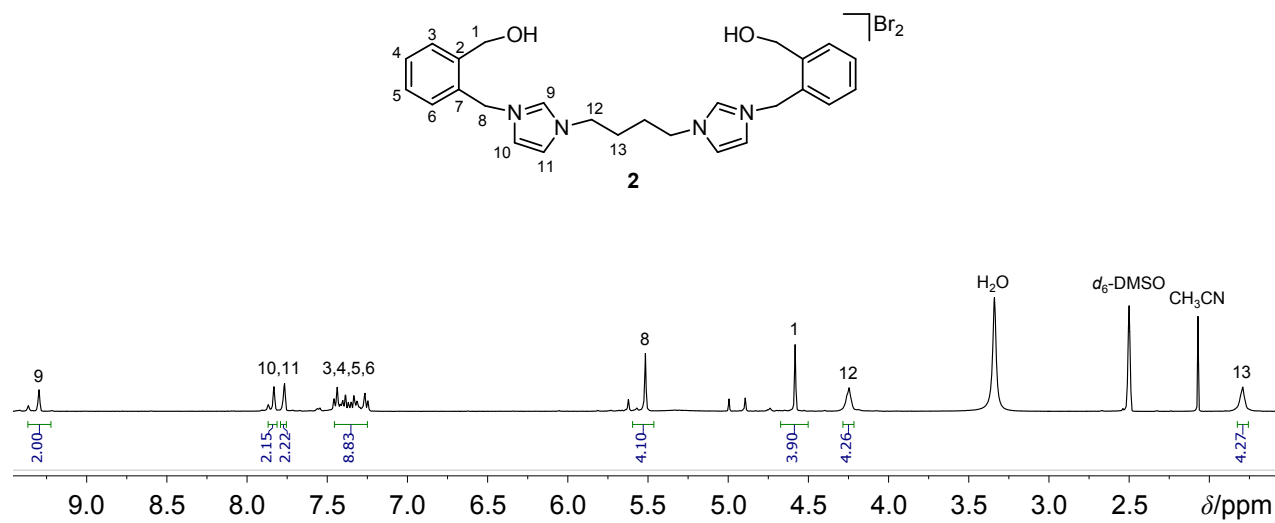

**Figure S1.**  $^1\text{H}$  NMR spectrum of diimidazolium salt **2** in  $\text{DMSO-}d_6$ .

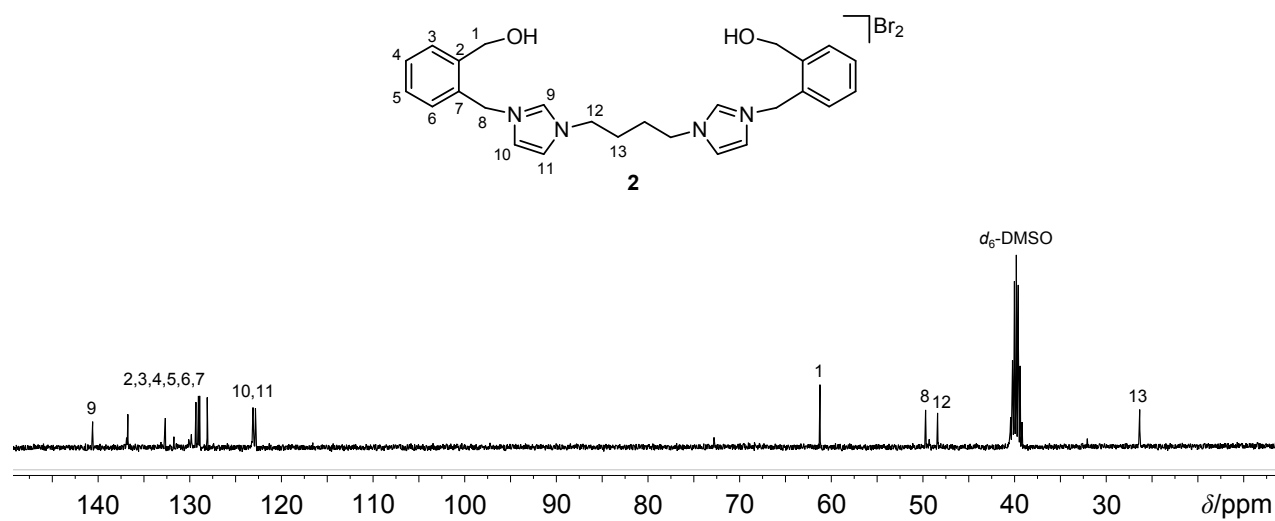

**Figure S2.**  $^{13}\text{C}\{^1\text{H}\}$  NMR spectrum of diimidazolium salt **2** in  $\text{DMSO-}d_6$ .

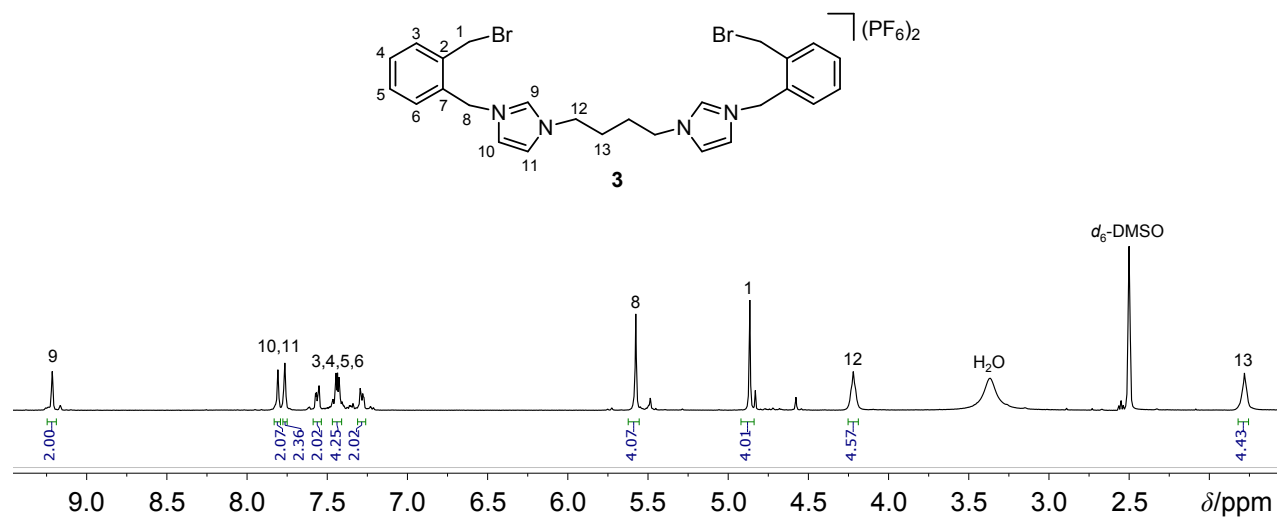

**Figure S3.** <sup>1</sup>H NMR spectrum of diimidazolium salt **3** in DMSO-*d*<sub>6</sub>.

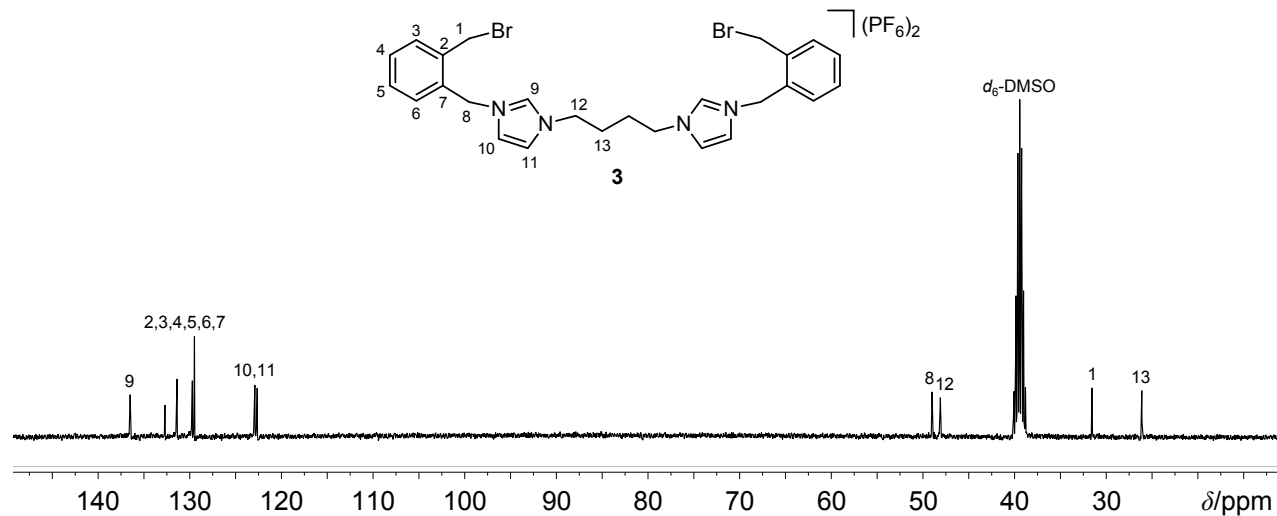

**Figure S4.** <sup>13</sup>C{<sup>1</sup>H} NMR spectrum of diimidazolium salt **3** in DMSO-*d*<sub>6</sub>O.

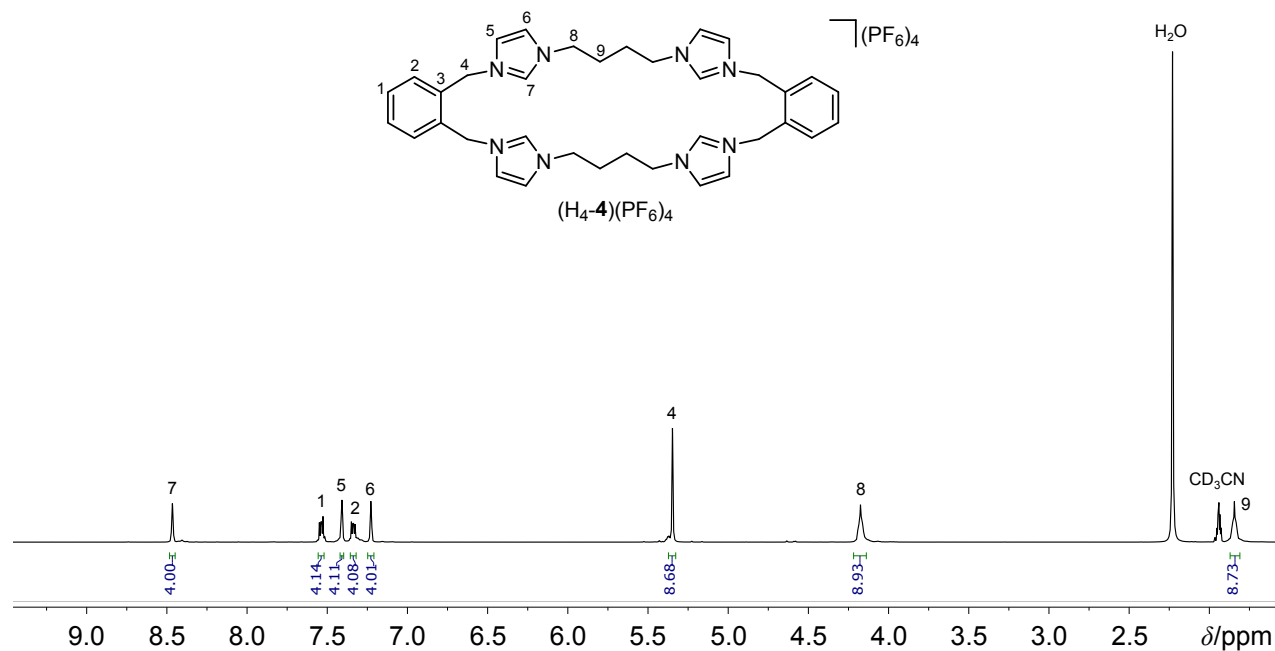

**Figure S5.**  $^1H$  NMR spectrum of tetraimidazolium salt  $(H_4-4)(PF_6)_4$  in  $CD_3CN$ .

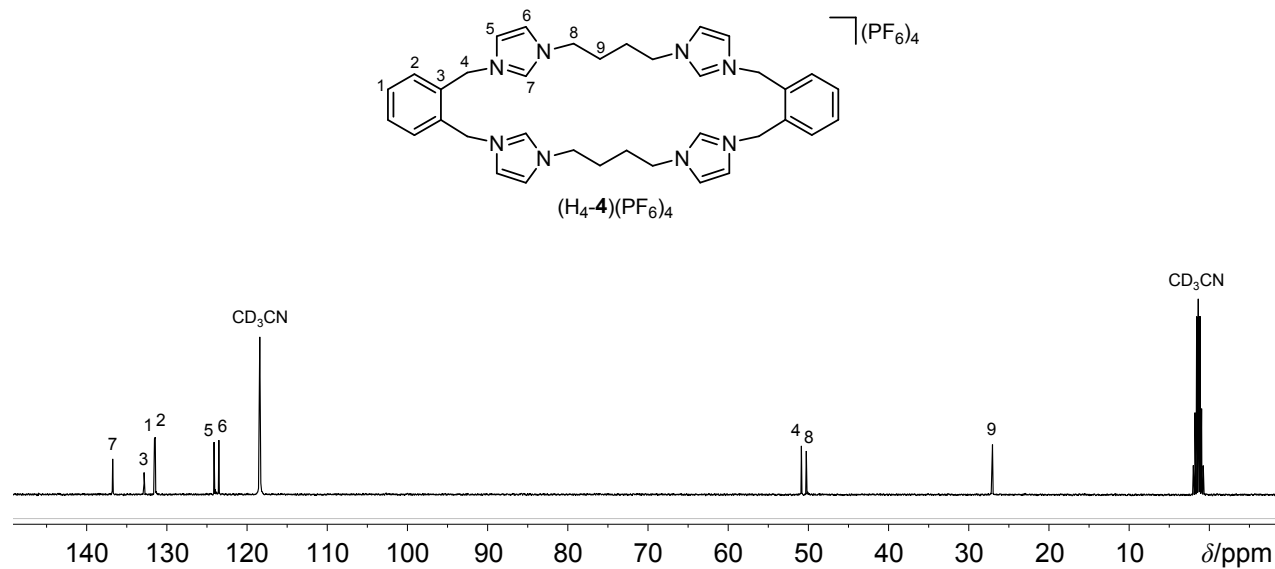

**Figure S6.**  $^{13}C\{^1H\}$  NMR spectrum of tetraimidazolium salt  $(H_4-4)(PF_6)_4$  in  $CD_3CN$ .

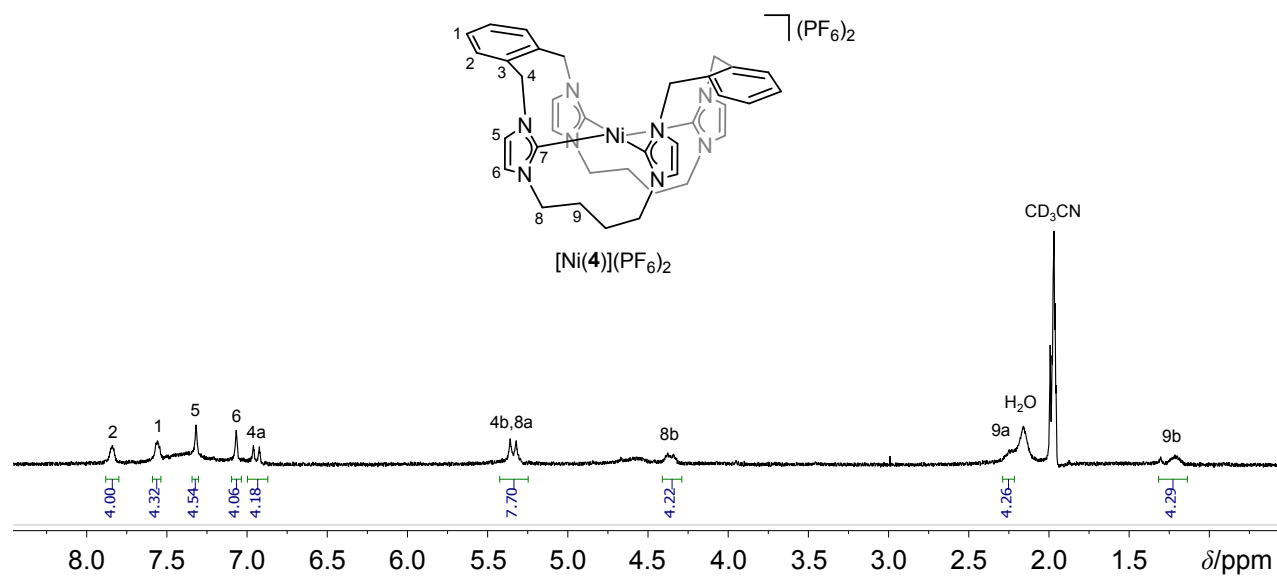

**Figure S7.**  $^1\text{H}$  NMR spectrum of nickel(II) complex  $[\text{Ni}(\mathbf{4})](\text{PF}_6)_2$  in  $\text{CD}_3\text{CN}$ .

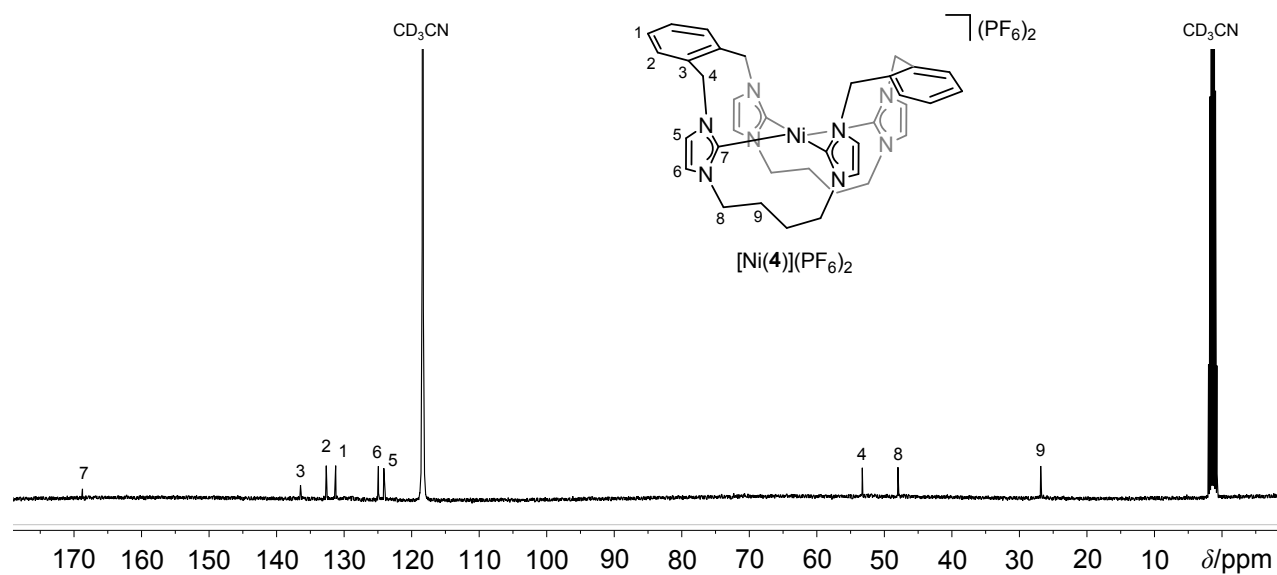

**Figure S8.**  $^{13}\text{C}\{^1\text{H}\}$  NMR spectrum of nickel(II) complex  $[\text{Ni}(\mathbf{4})](\text{PF}_6)_2$  in  $\text{CD}_3\text{CN}$ .

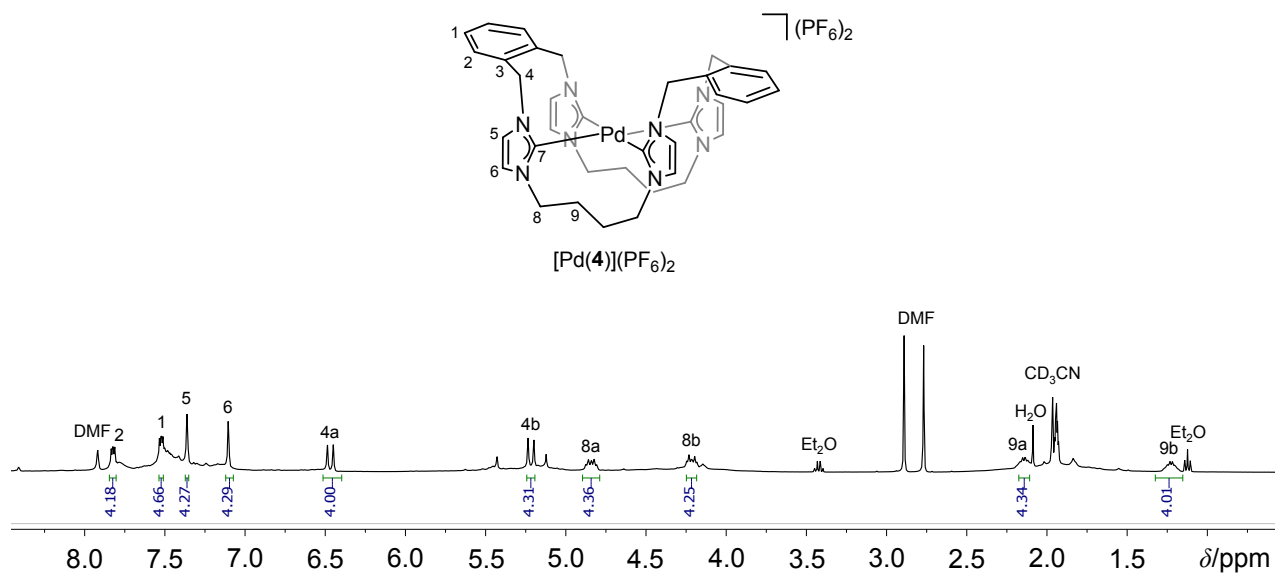

**Figure S9.**  $^1\text{H}$  NMR spectrum of palladium(II) complex  $[\text{Pd}(\mathbf{4})](\text{PF}_6)_2$  in  $\text{CD}_3\text{CN}$ .

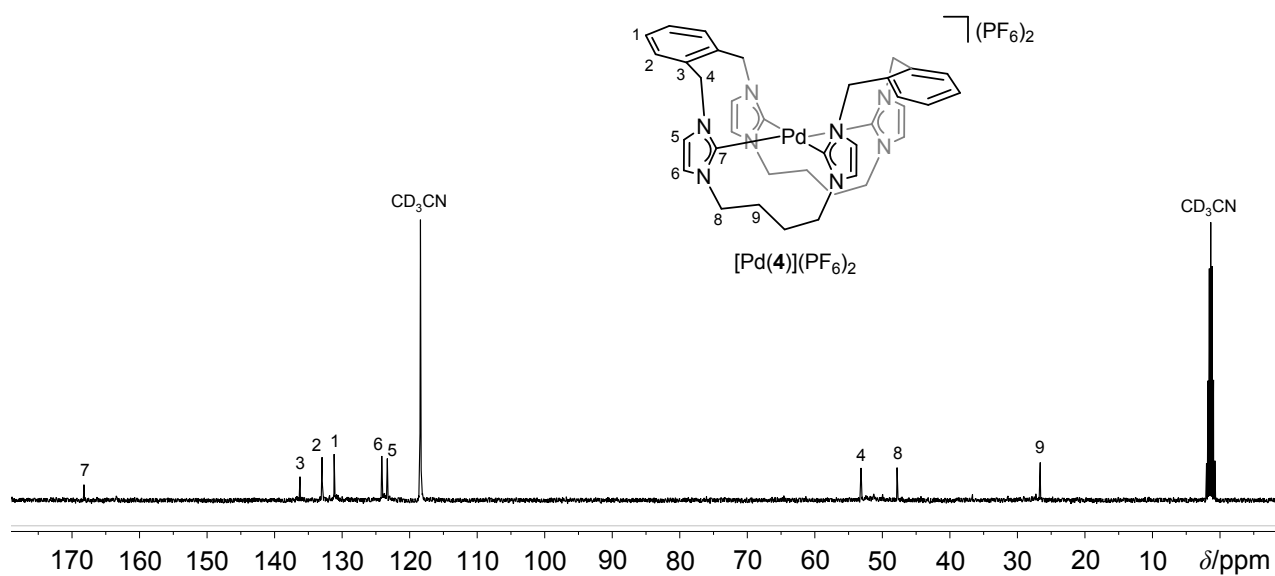

**Figure S10.**  $^{13}\text{C}\{^1\text{H}\}$  NMR spectrum of palladium(II) complex  $[\text{Pd}(\mathbf{4})](\text{PF}_6)_2$  in  $\text{CD}_3\text{CN}$ .

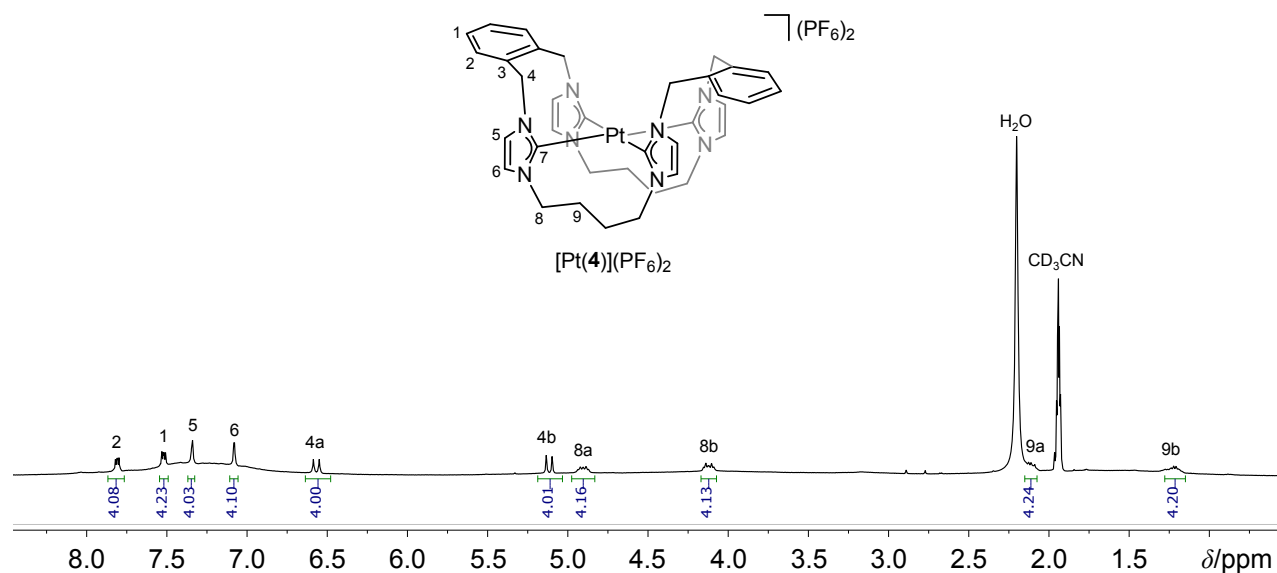

**Figure S11.** <sup>1</sup>H NMR spectrum of platinum(II) complex [Pt(4)](PF<sub>6</sub>)<sub>2</sub> in CD<sub>3</sub>CN.

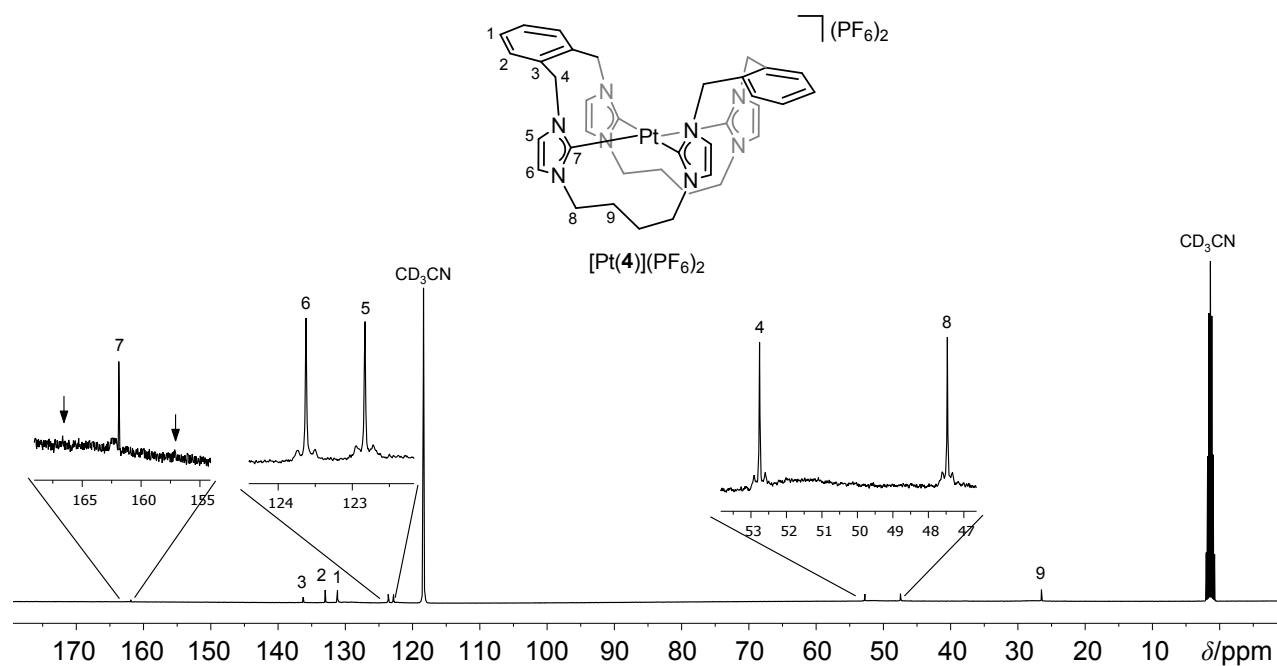

**Figure S12.** <sup>13</sup>C{<sup>1</sup>H} NMR spectrum of platinum(II) complex [Pt(4)](PF<sub>6</sub>)<sub>2</sub> in CD<sub>3</sub>CN.

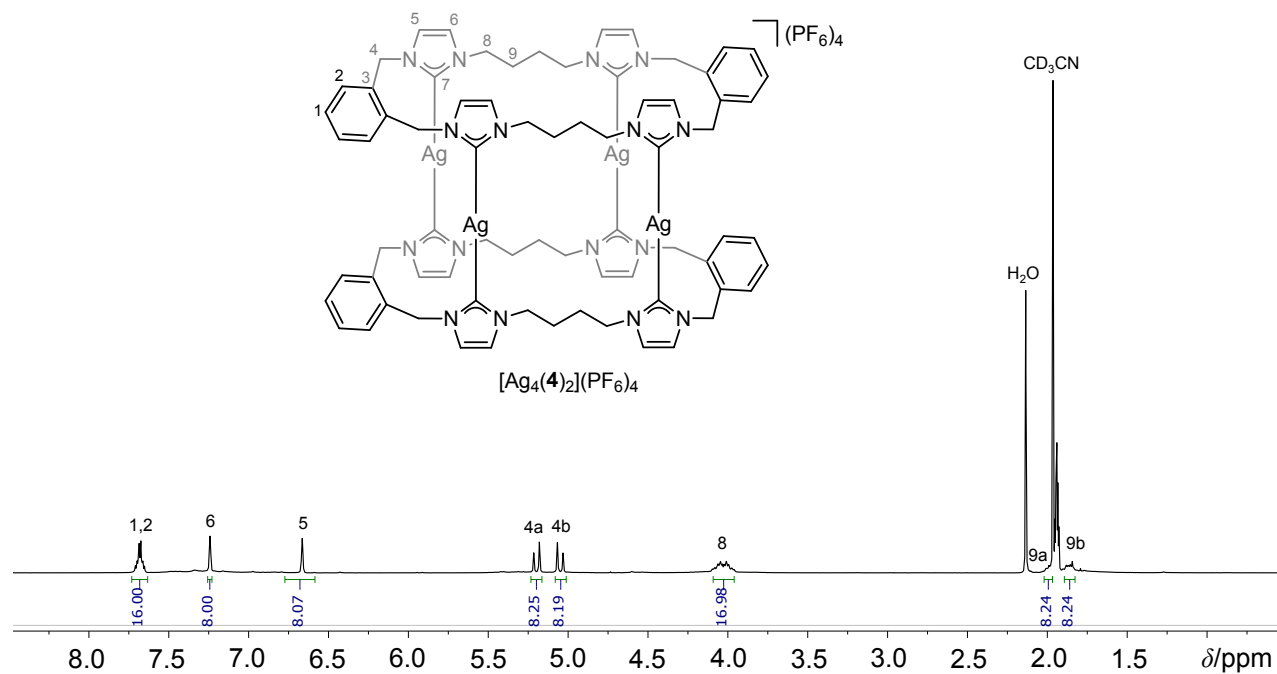

**Figure S13.**  $^1\text{H}$  NMR spectrum of silver(I) complex  $[\text{Ag}_4(\mathbf{4})_2](\text{PF}_6)_4$  in  $\text{CD}_3\text{CN}$ .

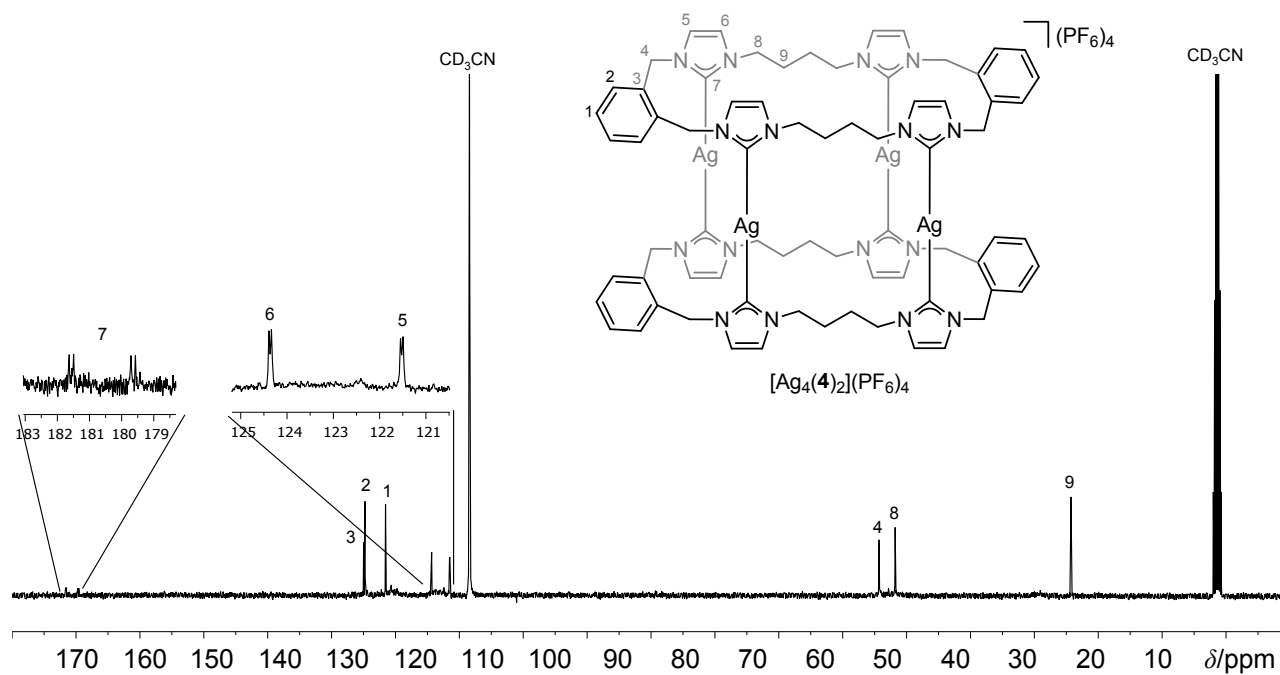

**Figure S14.**  $^{13}\text{C}\{^1\text{H}\}$  NMR spectrum of silver(I) complex  $[\text{Ag}_4(\mathbf{4})_2](\text{PF}_6)_4$  in  $\text{CD}_3\text{CN}$ .
